# Supplementary material for: Use of Danish National Somatic Cell Count Data to Assess the Need for Dry-Off Treatment in Holstein Dairy Cattle
Source: MDPI journal article supplement (doi:10.3390/ani13152523), 2023-08-04
Supplement: s1 [file s1]

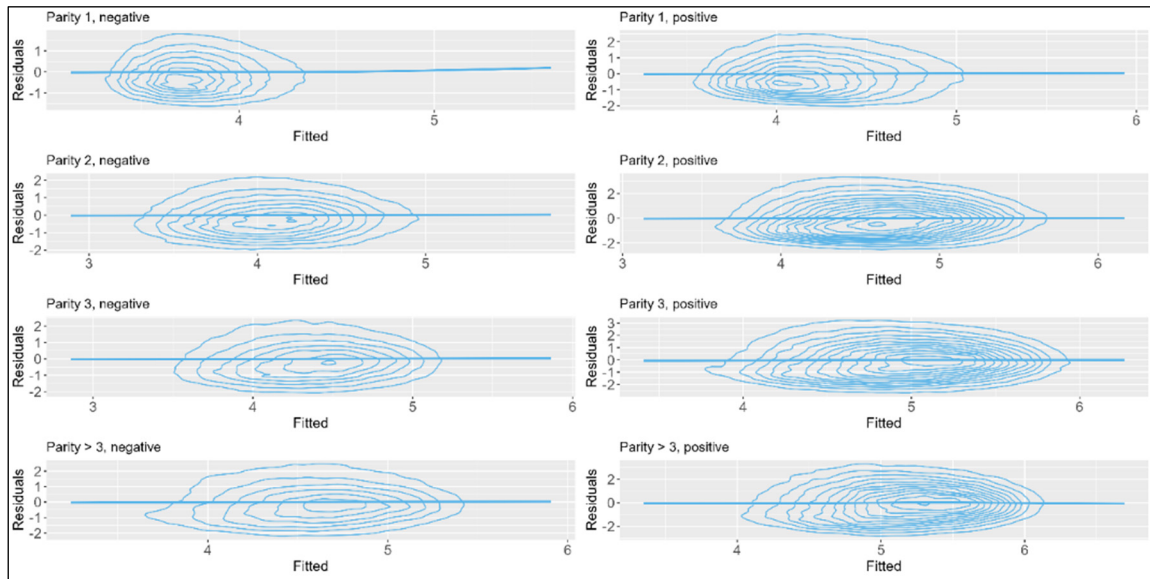

**Figure S1.** Density plot presenting the residuals vs fitted for the eight different models: to the left, PCR negative for Parities 1, 2, 3, and >3, and to the right, PCR positive for Parities 1, 2, 3, and >3.
